# Supplementary material for: Regulatory effect of two Trichinella spiralis serine protease inhibitors on the host’s immune system
Source: PubMed Central journal article supplement (PMC6863830; doi:10.1038/s41598-019-52624-5), 2019-11-19

# **Regulatory effect of two *Trichinella spiralis* serine protease inhibitors on the host's immune system**

Jingyun Xu <sup>a</sup>, Pengcheng Yu <sup>b</sup>, Lijia Wu <sup>c</sup>, Mingxu Liu <sup>d</sup>, Yixin Lu <sup>\*</sup>

## **Address:**

<sup>a,b,c,d,\*</sup> Heilongjiang Key Laboratory for Zoonosis, *College of Veterinary Medicine, Northeast Agricultural University, 600 Changjiang Street, Harbin 150030, China*, <sup>a</sup> 941606672@qq.com, <sup>b</sup> [827076925@qq.com](mailto:827076925@qq.com), <sup>c</sup> [1192256206@qq.com](mailto:1192256206@qq.com), <sup>d</sup> 1292849000@qq.com.

\* Corresponding author. Tel.: +86 451 5519 0729 (Yixin Lu).

\* *E-mail address:* luyixin@neau.edu.cn (Yixin Lu).

The full length western blots for the JAK/STAT proteins

p-JAK2

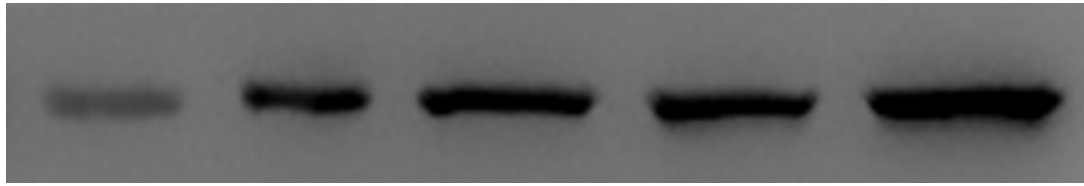

JAK2

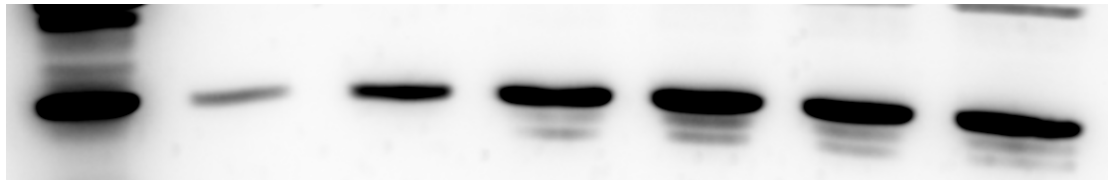

$\beta$ -Actin

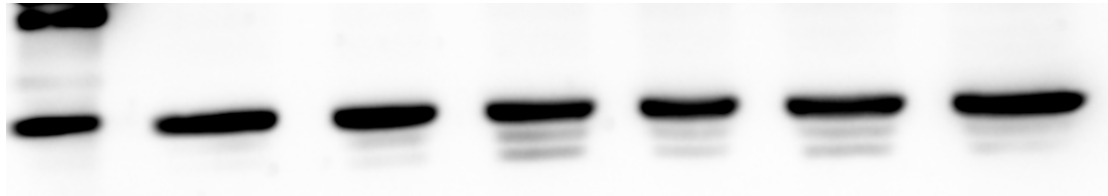

p-STAT3

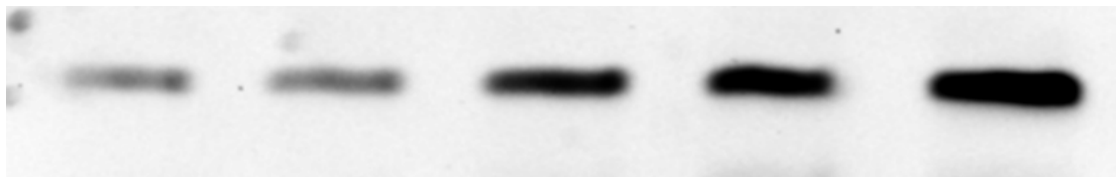

STAT3

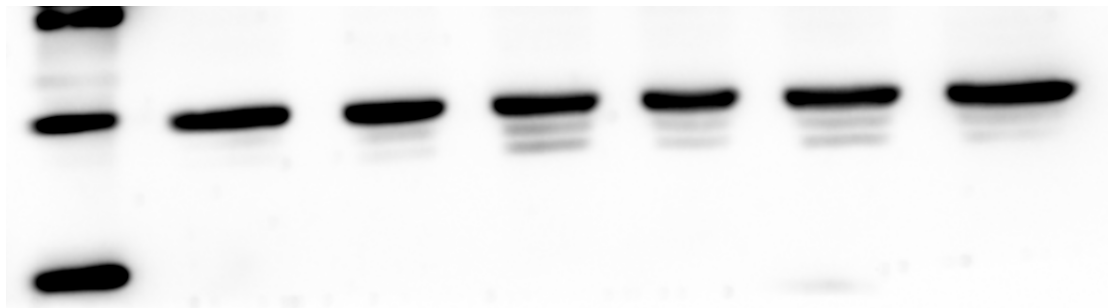

$\beta$ -Actin

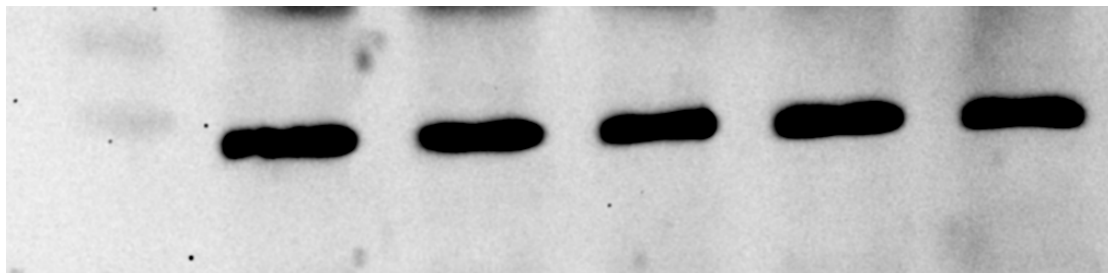

Supplement: 41598_2019_52624_MOESM1_ESM.pdf [file 41598_2019_52624_MOESM1_ESM.pdf]
